# Supplementary material for: Perylenediimide functionalized bridged-siloxane nanoparticles for bulk heterojunction organic photovoltaics
Source: Royal Society of Chemistry journal article supplement (doi:10.1039/c2nr30538k), 2012-01-01
Supplement: c2nr30538k.pdf [file c2nr30538k.pdf]

## Supporting Information

### Perylenediimide Functionalized Bridged-Siloxane Nanoparticles for Bulk Heterojunction Organic Photovoltaics

Hemali Rathnayake\*, Jenna Binion, Aaron McKee, Debra Jo Scardino<sup>‡</sup>, and Nathan I. Hammer<sup>\*\*</sup>

<sup>\*</sup>*Department of Chemistry & Advanced Materials Institute, Western Kentucky University, Bowling Green, KY 42101,* <sup>‡</sup>*Department of Chemistry & Biochemistry, University of Mississippi, MS 38677.*

\* Corresponding authors. Tel.: +1-270-745-6238; fax: +1-270-745-5361.

E-mail address: [hemali.rathnayake@wku.edu](mailto:hemali.rathnayake@wku.edu) (Hemali Rathnayake), [nhammer@olemiss.edu](mailto:nhammer@olemiss.edu) (Nathan Hammer).

#### Experimental Part

**Materials.** 3,4,9,10-tetracarboxyanhydrideperylene, regioregular poly(3-hexylthiophene) (average  $M_n$  30,000 - 60,000 g/mol), tert-butylmagnesiumchloride (1M in THF), and anhydrous tetrahydrofuran were obtained from Aldrich chemicals. Ammonium hydroxide (28%) was obtained from Fischer Scientific. Tetraethoxysilane, and 3-aminopropyltriethoxysilane were purchased from Alfar Aesar and used as received. Unless otherwise specified, all chemicals were used as received.

**Characterization.** Proton NMR spectra were recorded on a 500 MHz Jeol using  $CDCl_3$  as a solvent. FTIR spectra were measured using a Perkin-Elmer Spectrum One FT-IR spectrometer equipped with a universal ATR sampling accessory. Transmission electron microscopy (TEM) observations were performed on a 100CX JEOL at 80 keV. Thermogravimetric analysis was performed at Thermal Analysis Laboratory at Western Kentucky University. The samples were analyzed by a TA Q5000TGA. The samples were held isothermal at room temperature for 30 min and then heated from room temperature to 650 °C at 10 °C/min in nitrogen. The purge gas

was heated at 10 °C/min to 800 °C. The elemental compositions of the silane precursor (**1**) and the PDIB-NPs were analyzed by Micro-Elemental Analysis Lab at Advanced Materials Institute, Western Kentucky University. The photophysical properties in solution were performed on fluorescence spectrometer (Perkin Elemer LS 55) and UV-visible spectrometer (Perkin Elemer, Lambda 35). Thin films were prepared by spin coating the blends onto cleaned glass coverslips. The 457 and 514 laser lines from a Coherent Innova 200 Ar ion laser were used to excite the thin films with a typical excitation power of 100  $\mu$ W. A Nikon TE2000U inverted microscope with a 100x 1.4 NA oil immersion objective was employed for laser excitation and also for collection of the emitted light. Spectra were dispersed using a Princeton Instruments 2150 spectrograph (300 grooves/mm grating) and detected using a Princeton Instruments ProEM EMCCD camera (1024 x 1025 pixels). To reduce filter effects on the resulting spectra, a mirror rather than a dichroic filter was employed for excitation of the sample and either a long pass filter (for 457 nm excitation) or 514 nm notch filter was employed in the collection of the emitted light.

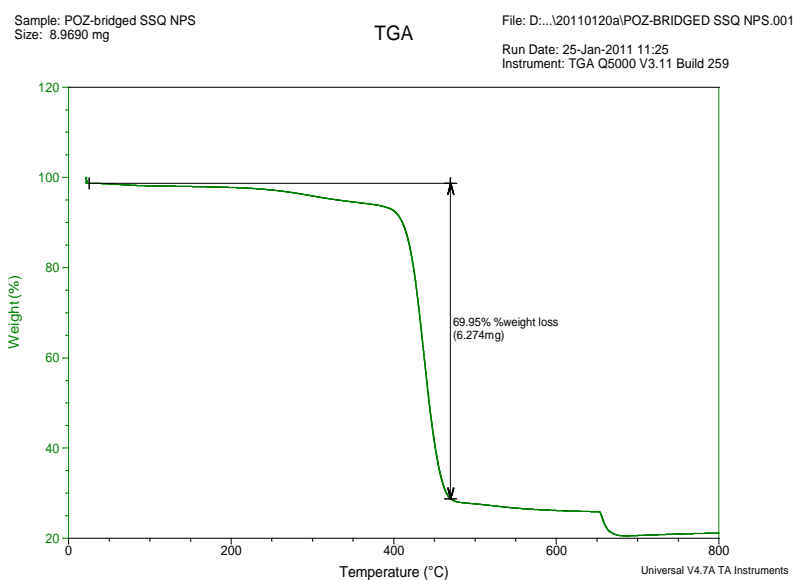

**Figure S1:** TGA curve of PDIB-1-NPs in Table 1

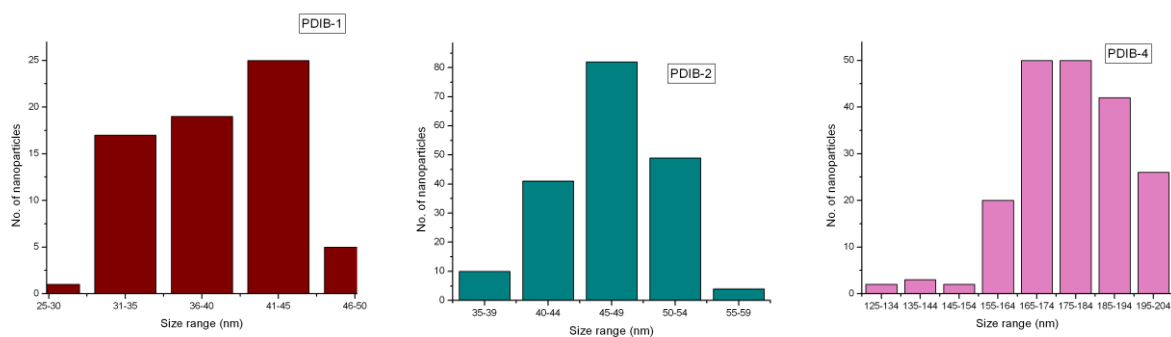

**Figure S2:** Size-distribution graphs for **PDIB-1**, **PDIB-2** and **PDIB-4**.

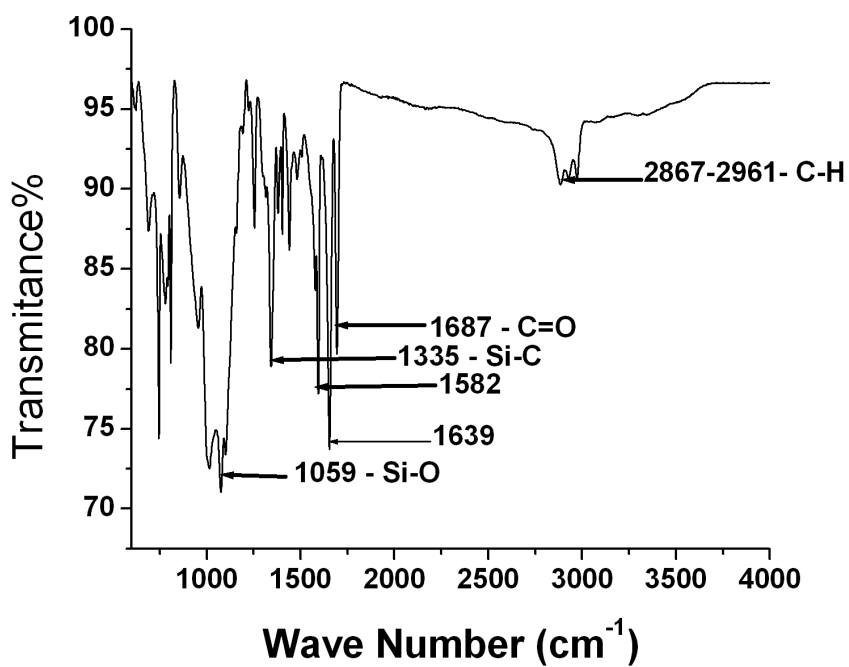

**Figure S3:** FT-IR spectrum of PDI-bridged-silane precursor.

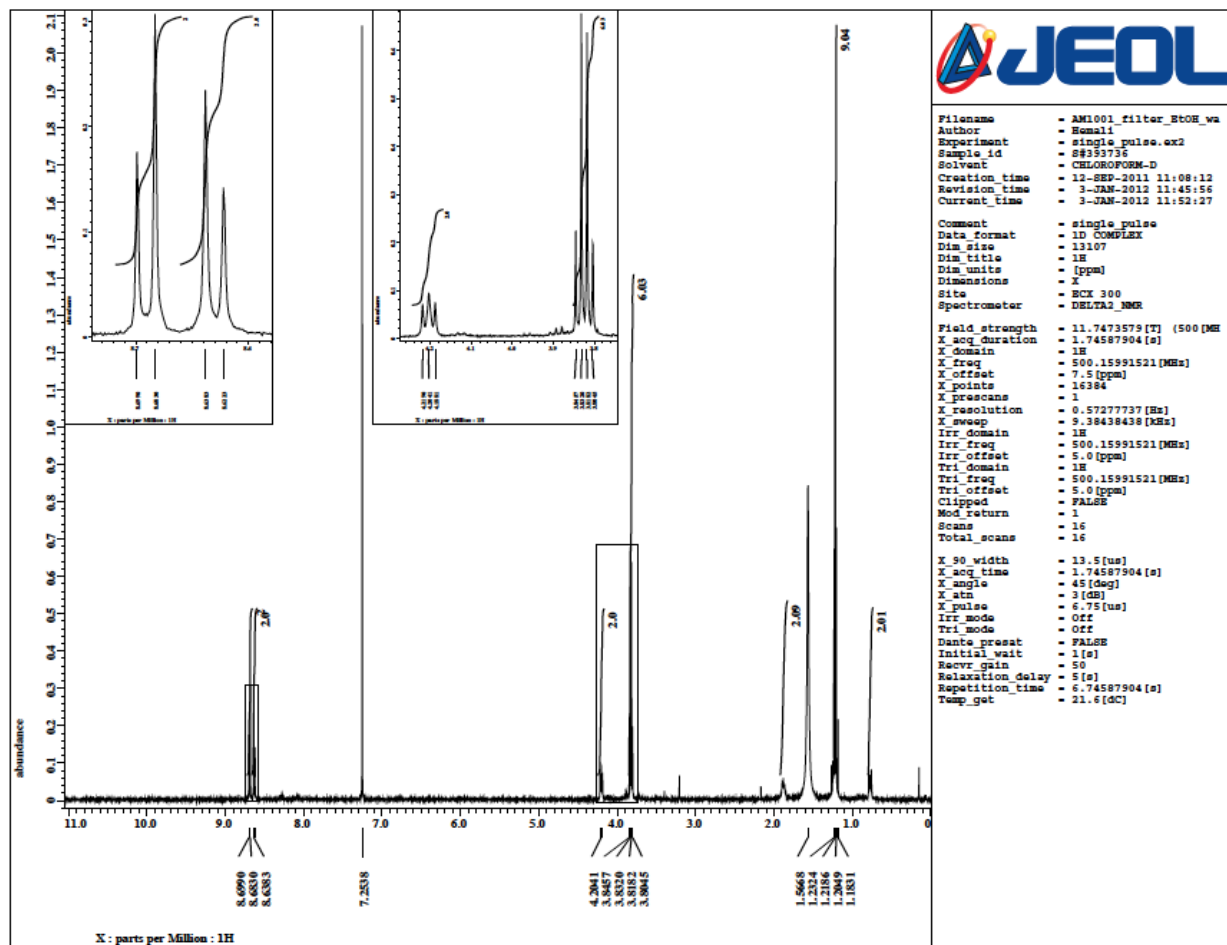

**Figure S4:**  $^1\text{H}$ -NMR spectrum of PDI-bridged-silane precursor.

### Photovoltaic properties of PDIB- NPs:

Three sets of model devices with device area of  $2 \times 6 \text{ mm}^2$  were prepared by changing the following device parameters;

**Set 1:** The device configuration used was ITO/PEDOT:PSS/1:1 P3HT-PDIB-NPs/ LiF/Al.

**Set 2:** Active layer blending ratio of PDIB-NPs: P3HT was 2:1 with the device configuration of ITO/PEDOT:PSS/PDIB-NPs-P3HT/ Ca-Al.

**Set 3:** Devices with the configuration of ITO/PEDOT:PSS/PDIB-NPs-P3HT/ Ca-Al were annealed at annealation temperatures of 50, 75, 100, and 150 °C.

The Table S1 shows the device parameters and Figure 10 and 11 present the J-V curves for each set.

**Table S1.**

| Test devices | $V_{OC}$ (V) | $J_{SC}$ (mA/cm <sup>2</sup> )               |
|--------------|--------------|----------------------------------------------|
| Set 1        | 0.27         | 2.13                                         |
| Set 2        | 0.47         | 0.50                                         |
| Set 3        | 0.53         | 0.76 at 50 °C, 1.34 at 75 °C, 1.68 at 100 °C |
